# Supplementary material for: Obesity alters the long-term fitness of the hematopoietic stem cell compartment through modulation of Gfi1 expression
Source: PubMed Central journal article supplement — J Exp Med. 2018 Feb 5;215(2):627–44. doi: 10.1084/jem.20170690 (PMC5789409; doi:10.1084/jem.20170690), 2018-02-05
Supplement: JEM_20170690_sm.pdf [file JEM_20170690_sm.pdf]

SUPPLEMENTAL MATERIAL

Lee et al., <https://doi.org/10.1084/jem.20170690>

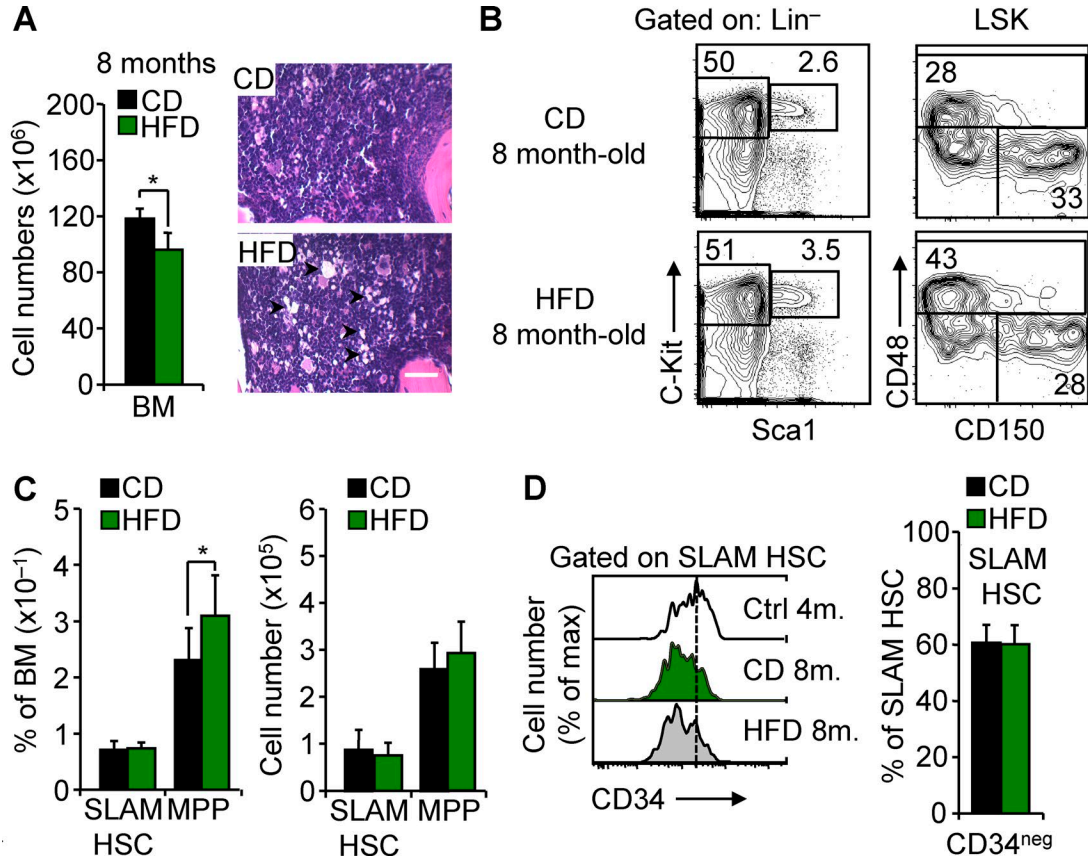

Figure S1. **Hematopoietic disruption in obesity.** (A) BM cellularity of 8-mo-old HFD-fed mice compared with CD-fed littermates. Results are expressed as means  $\pm$  SD.  $n = 9$ /group. Images show H&E staining of BM sections from CD and HFD mice ( $n = 3$ ). Arrowheads indicate adipocytes. Bar, 100  $\mu$ m. (B) FACS plots of HSPC populations in the BM 8-mo-old CD and HFD mice.  $n = 9$ . (C) Mean percentages  $\pm$  SD (left) and absolute numbers (right) of HSPC populations in the BM of 4-mo-old *Ctrl* and *db* mice.  $n = 9$ /group. Student's *t* test; \*,  $P \leq 0.05$ . (D) Representative FACS plots showing expression of the CD34 marker in SLAM HSCs (left) and mean percentages  $\pm$  SD (right) of HFD SLAM HSCs negative for CD34.  $n = 9$ /group.

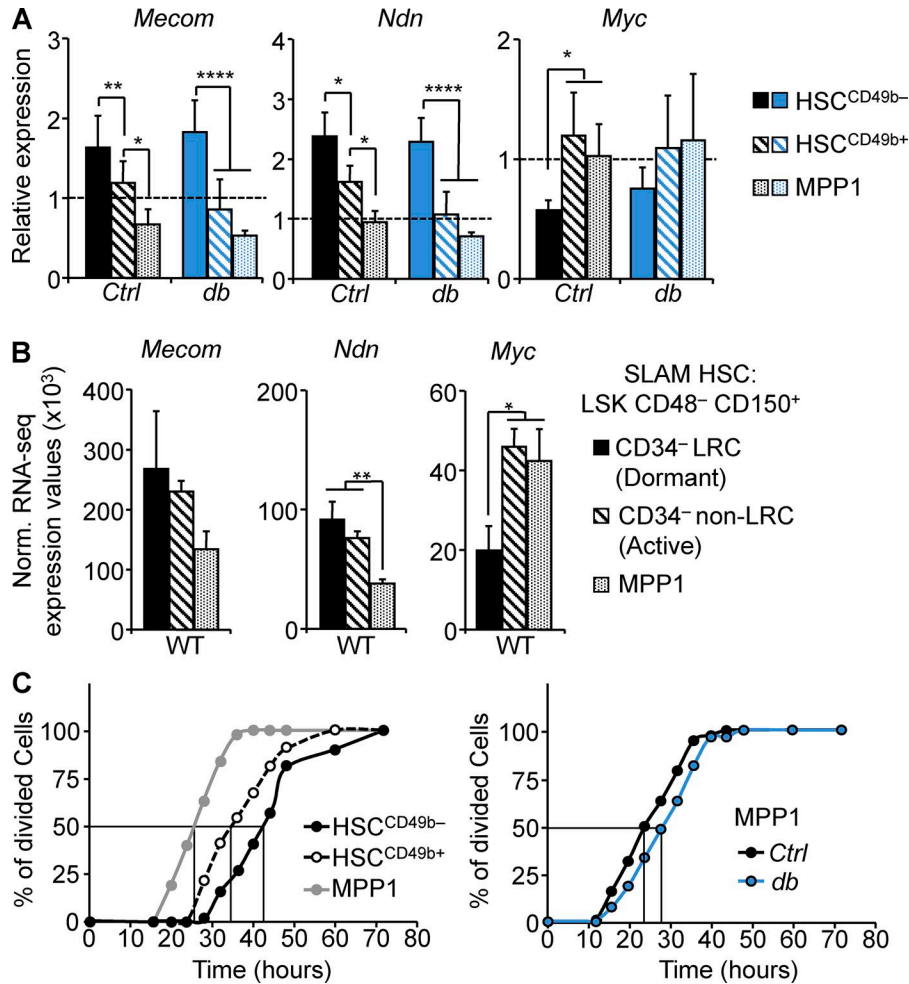

Figure S2. **Molecular characteristics of the HSC subsets isolated from *Ctrl* and *db* mice.** (A) qRT-PCR analyses for *Mecom*, *Myc*, and *Ndn* gene expression in HSC subsets isolated from 4-mo-old *Ctrl* and *db* mice. Results are expressed as fold change  $\pm$  SD relative to total *Ctrl* SLAM HSCs set at 1.  $n = 6$  pools of 100 cells. Two-way ANOVA with Tukey's post hoc test; \*,  $P \leq 0.05$ ; \*\*,  $P \leq 0.005$ ; \*\*\*\*,  $P \leq 0.0001$ . Two independent experiments. (B) Mean RNA-seq expression for *Mecom*, *Myc*, and *Ndn* transcripts in dormant LRC HSCs, active non-LRC HSCs, and MPP1 cells.  $n = 3$  pools/group. One-way ANOVA with Tukey's post hoc test; \*,  $P \leq 0.05$ ; \*\*,  $P \leq 0.005$  (Cabezas-Wallscheid et al., 2017). (C) Single-cell tracking measuring the kinetics of the first division for cultured HSC subsets. Results are expressed as percentages of cells able to divide at least once during 72 h culture. The left panel shows the cell division kinetics of HSC subsets isolated from WT mice ( $n = 20, 30,$  and  $43$  cells, respectively). The right panel shows the cell division kinetics for MPP1 cells isolated from 4-mo-old *Ctrl* and *db* mice ( $n = 38$  and  $29$  cells, respectively). Data are representative of two independent experiments.

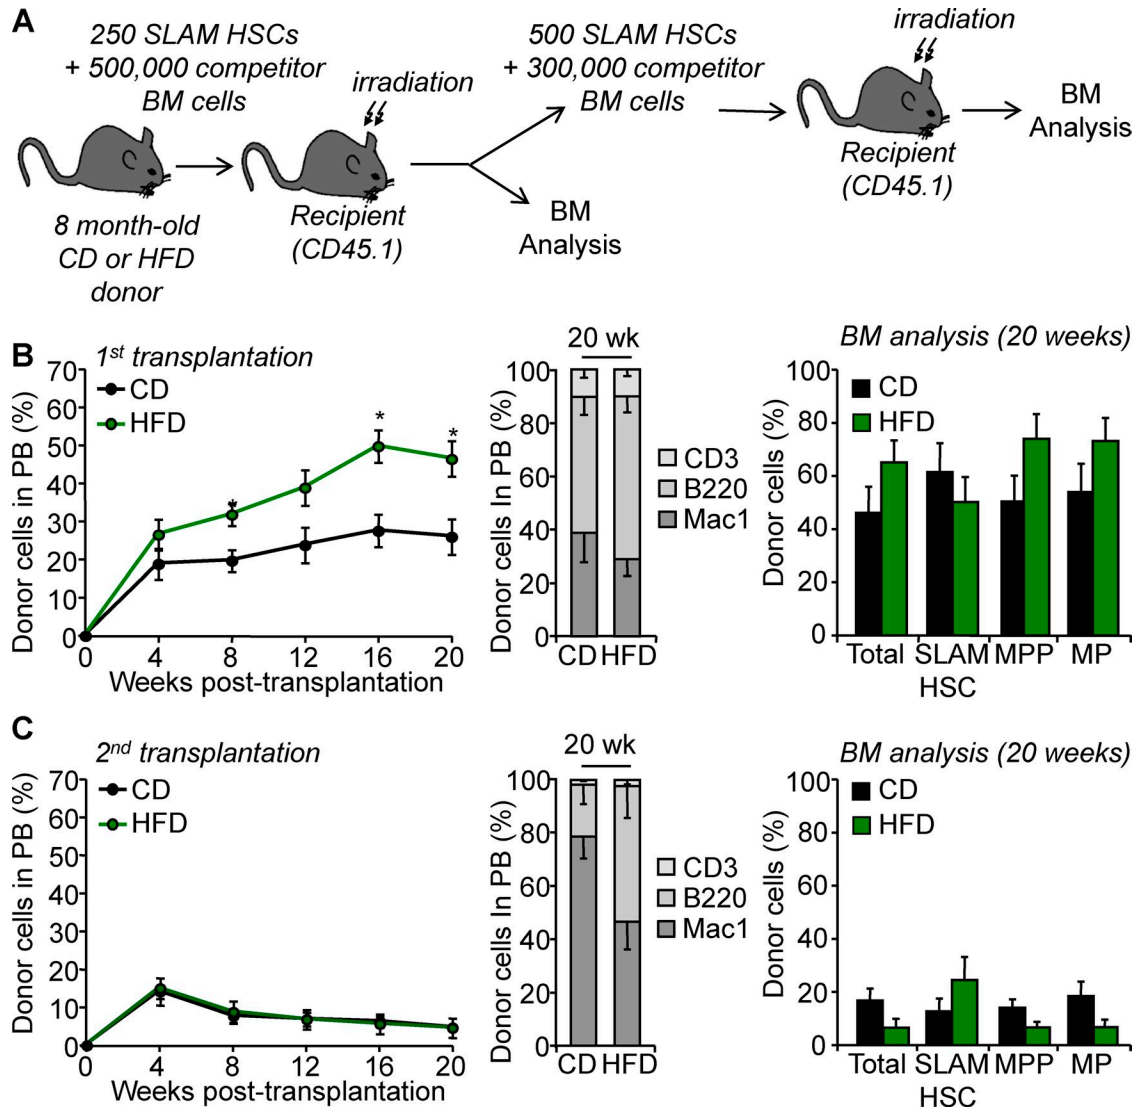

Figure S3. **Validation of the HSC functional dysregulation in dietary mouse model.** (A) Experimental scheme for serial transplantation assay. (B and C) Hematopoietic reconstitution in primary and secondary recipients. The left graph indicates PB chimerism over time. The middle graph shows myeloid and lymphoid PB chimerism 20 wk after transplantation. The right graph shows the percentage of donor-derived total BM cells, SLAM HSCs, MPPs, and myeloid progenitors (MPs) 20 wk after transplantation. Results are expressed as means  $\pm$  SEM.  $n = 4$ /group. Student's  $t$  test; \*,  $P \leq 0.05$ . Two independent experiments.

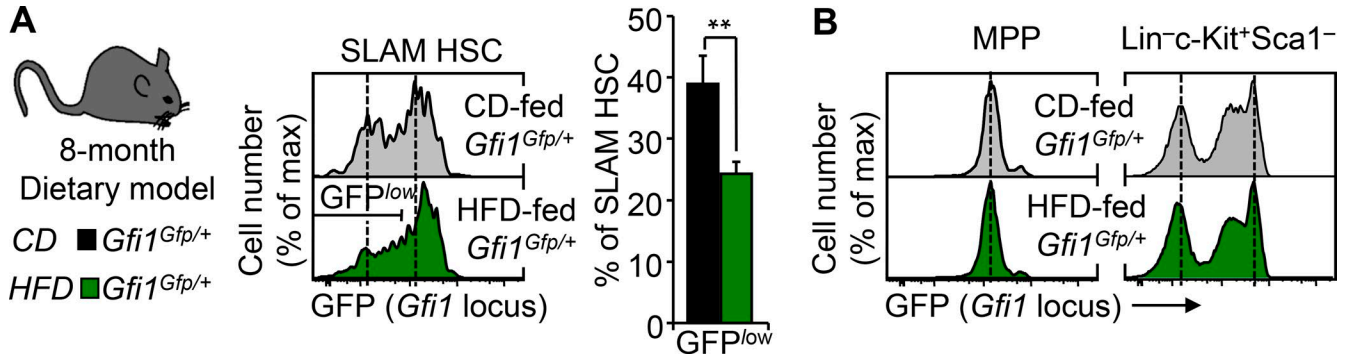

Figure S4. **Activity of the *Gfi1* locus in HSCs isolated from mice fed with HFD.** (A) Representative FACS plots showing GFP fluorescence in the SLAM HSCs of 8-mo-old CD- and HFD-fed *Gfi1<sup>Gfp/+</sup>* mice. The graph indicates mean percentages  $\pm$  SD of GFP<sup>low</sup> SLAM HSCs in each condition. \*\*,  $P \leq 0.005$ . (B) Representative FACS plots showing GFP fluorescence in MPPs (left) and in LK progenitors (right) of 8-mo-old CD- and HFD-fed *Gfi1<sup>Gfp/+</sup>* mice.  $n = 4$  mice/group.

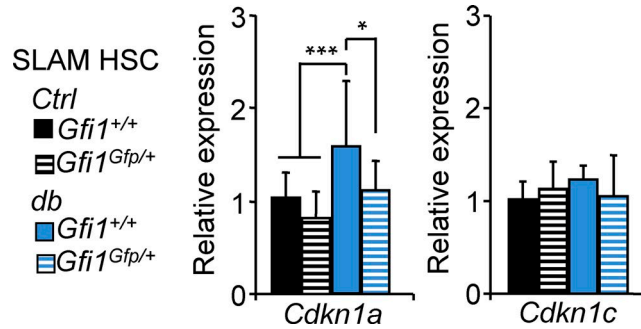

Figure S5. **Impact of *Gfi1* gene dosage on *Cdkn1a* expression.** qRT-PCR analyses for *Cdkn1a* and *Cdkn1c* genes in SLAM HSCs isolated from 4-mo-old *db*, *Ctrl::Gfi1<sup>Gfp/+</sup>*, and *db::Gfi1<sup>Gfp/+</sup>* mice. Results are expressed as fold change  $\pm$  SD relative to control SLAM HSCs.  $n = 8-18$ . One-way ANOVA with Tukey's post hoc test; \*,  $P \leq 0.05$ ; \*\*\*,  $P \leq 0.001$ . Two independent experiments.

Table S1. List of antibodies used in this study

| Name                   | Alternative name  | Clone        | Fluorochrome    | Source                   | Catalog number |
|------------------------|-------------------|--------------|-----------------|--------------------------|----------------|
| Ter119                 | Ly-76             | TER-119      | Purified        | BioLegend                | 116202         |
| Mac1                   | CD11b, Integrin a | M1/70        | Purified        | BioLegend                | 101202         |
| Gr1                    | Ly-6C             | RB6-8C5      | Purified        | BioLegend                | 108402         |
| B220                   | CD45R             | RA-3-6B2     | Purified        | BioLegend                | 103202         |
| CD5                    |                   | 53-7.3       | Purified        | BioLegend                | 100602         |
| CD3                    |                   | 17A2         | Purified        | BioLegend                | 100202         |
| CD4                    |                   | GK1.5        | Purified        | BioLegend                | 100402         |
| CD8                    |                   | 53-6.7       | Purified        | BioLegend                | 100702         |
| CD127                  | IL-7Ra            | A7R34        | Purified        | eBioscience              | 14-1271-85     |
| Goat anti-rat<br>c-kit | CD117             | 2B8          | APC-eFluor780   | Thermo Fisher Scientific | A10691         |
| Sca1                   | Ly-6a/e           | D7           | PB              | eBioscience              | 47-1171-82     |
| Fik2                   |                   | A2F10        | Biotin          | BioLegend                | 108120         |
| CD48                   |                   | HM48-1       | Biotin          | eBioscience              | 13-1351-85     |
| CD150                  |                   | TC15-12F12.2 | A647            | BioLegend                | 103416         |
| CD34                   |                   | RAM34        | PE              | BioLegend                | 115904         |
| FcgR                   |                   | 93           | FITC            | eBioscience              | 11-0341-85     |
| CD49b                  |                   | DX5          | PerCP-eFluor710 | eBioscience              | 46-0161-80     |
| CD49b                  |                   | DX5          | Biotin          | BioLegend                | 108903         |
| Streptavidin           |                   |              | PerCP-Cy5.5     | BioLegend                | 108915         |
| IgM                    |                   | II/41        | Pecy7           | BioLegend                | 405206         |
| B220                   |                   | RA3-6B2      | APC-eFluor780   | eBioscience              | 47-5790-82     |
| CD19                   |                   | eBio1D3      | BV421           | BioLegend                | 103239         |
| CD127                  | IL-7Ra            | SB/199       | Alexa Fluor 700 | eBioscience              | 56-0193-80     |
| Ki67                   |                   | 16A8         | Biotin          | BioLegend                | 121104         |
|                        |                   |              | PE              | BioLegend                | 652404         |

Table S2. List of primers used in this study

| Primer        | Direction | Sequence (5'-3')          |
|---------------|-----------|---------------------------|
| <i>Gfi1</i>   | Forward   | CCCGGCCCTATCCCTGTC        |
| <i>Gfi1</i>   | Reverse   | CACCTGGCATTGTGGGGCT       |
| <i>Bmi1</i>   | Forward   | GGAGTAAATGGACATACCC       |
| <i>Bmi1</i>   | Reverse   | AAAGTTCCTCTTCATACATG      |
| <i>HoxB4</i>  | Forward   | CGTCTACCCCTGGATGCCG       |
| <i>HoxB4</i>  | Reverse   | CCTGCTGGCGAGTGTAGGC       |
| <i>Cdkn1a</i> | Forward   | GGCGCAGATCCACAGCGAT       |
| <i>Cdkn1a</i> | Reverse   | GGGACCGAAGAGACAACGGC      |
| <i>Cdkn1b</i> | Forward   | GGGATGAGGAAGCGACCTGC      |
| <i>Cdkn1b</i> | Reverse   | GTGCCAGCGTTCGGGGAA        |
| <i>Cdkn1c</i> | Forward   | ACCAGCCTCTCTCGGGGATT      |
| <i>Cdkn1c</i> | Reverse   | GCAGTTCTCTTGGCCTTGGC      |
| <i>Myc</i>    | Forward   | AGGCTGGATTTCTTTGGCGTT     |
| <i>Myc</i>    | Reverse   | GTTGAGGGGCATCGTCGTGG      |
| <i>Mecom</i>  | Forward   | TGTGCCAGAGGAGCTTAAACAGACC |
| <i>Mecom</i>  | Reverse   | GGGAGGTGGGATGGAGGGAAT     |
| <i>Ndn</i>    | Forward   | GCTCATGTGGTACGTGTTGG      |
| <i>Ndn</i>    | Reverse   | TGCTTCTGCACCATTTCTTG      |
| <i>Actb</i>   | Forward   | CCCTAAGGCCAACCGTGAAA      |
| <i>Actb</i>   | Reverse   | CAGCCTGGATGGCTACGTAC      |

Table S3 is a separate Excel document showing source data for the heatmap of bulk gene expression and GSEAs generated from 4-mo *Ctrl* and *db* SLAM HSCs.

## REFERENCE

Cabezas-Wallscheid, N., F. Buettner, P. Sommerkamp, D. Klimmeck, L. Ladell, F.B. Thalheimer, D. Pastor-Flores, L.P. Roma, S. Renders, P. Zeisberger, et al. 2017. Vitamin A-Retinoic Acid Signaling Regulates Hematopoietic Stem Cell Dormancy. *Cell*. 169:807–823. <https://doi.org/10.1016/j.cell.2017.04.018>
